# Supplementary material for: Treatment for radiographically active, sputum culture-negative pulmonary tuberculosis: a systematic review and meta-analysis
Source: bioRxiv or medRxiv preprint supplement (doi:10.1101/2023.01.27.23285085), 2023-01-28
Supplement: Supplementary file [file media-1.pdf]

## Title

Treatment for radiographically active, sputum culture negative pulmonary tuberculosis: a systematic review and meta-analysis

## Supplementary Material

### Example search strategy for MEDLINE (Ovid, from 1946)

1. Mycobacterium tuberculosis/
2. tuberculosis.ti, ab, kf
3. TB.ti, ab, kf
4. exp tuberculosis/
5. 1 or 2 or 3 or 4
6. (Abacillary or "doubtful activity").ti, ab, kf
7. (culture adj2 negative).ti, ab, kf
8. (smear adj2 negative).ti, ab, kf
9. (xray or x ray or x-ray or cxr).ti, ab, kf
10. 6 or 7 or 8 or 9
11. exp Antitubercular Agents/
12. Mycobacterium tuberculosis/de [Drug Effects]
13. Tuberculosis/dt [Drug Therapy]
14. chemotherapy, adjuvant/ or drug therapy, combination/
15. Drug Administration Schedule/
16. Tuberculosis, Pulmonary/th [Therapy]
17. antitubercul\* agent\*.ti, ab, kf
18. antitubercul\* drug\*.ti, ab, kf
19. chemotherapy.ti, ab, kf
20. exp Drug Therapy/
21. 11 or 12 or 13 or 14 or 15 or 16 or 17 or 18 or 19 or 20
22. 5 and 10 and 21
23. exp Animals/
24. Humans/
25. 23 not 24
26. 22 not 25

### Supplementary table S1: Definitions of secondary outcomes

| Secondary Outcome                 | Definition                                                                                                                                                                   |
|-----------------------------------|------------------------------------------------------------------------------------------------------------------------------------------------------------------------------|
| Radiologically confirmed TB       | Progression of CXR changes consistent with TB during follow-up as compared to baseline, with no microbiological confirmation, and in the absence of an alternative diagnosis |
| Clinical evidence of tuberculosis | Symptoms or clinical findings leading to a diagnosis of active tuberculosis by the treating physician, without supportive microbiological or radiographic evidence           |
| Safety outcomes                   | Patient adverse events reported during the study period from the first day of intervention, whether or not attributed to study intervention                                  |

|                      |                                                                                                                              |
|----------------------|------------------------------------------------------------------------------------------------------------------------------|
| Resistance           | Documentation of laboratory confirmed resistance to one or more anti-TB drugs included in the treating regimen               |
| Treatment completion | Included participants who started the intervention and completed the intended course as per study protocol                   |
| Loss to follow-up    | Any patient who did not complete the intended follow-up period of the study, and as a result the primary outcome was unknown |

### List of included studies

1. Clayson C, Research committee of the Scottish Thoracic Society. A controlled trial of chemotherapy in pulmonary tuberculosis of doubtful activity. *Tubercle* 1958;39(3):129-137
2. Clayson C, Research committee of the Scottish Thoracic Society. A controlled trial of chemotherapy in pulmonary tuberculosis of doubtful activity: five year follow-up. *Tubercle* 1963;44(1):39-46
3. Frimodt-Moller J, Parthasarathy R, Thomas J. Results of treatment of non-bacillary tuberculosis in a domiciliary - a preliminary report. *Tuberculosis and chest diseases worker's conference* 1960
4. Pamra SP, Mathur GP. Effects of chemoprophylaxis on minimal pulmonary tuberculosis lesions of doubtful activity. *Bull WHO* 1971;45:593-602
5. Aneja KS, Gothi GD, Rupert Samuel GE. Controlled study of the effect of specific treatment on bacteriological status of 'suspect cases'. *Ind J Tub* 1979;26(2):50-57
6. Hong Kong Chest Service/Tuberculosis Research Centre Madras/British Medical Research Council. Sputum-smear-negative pulmonary tuberculosis. Controlled trial of 3-month and 2-month regimens of chemotherapy. First report. *Lancet* 1979;1(8131):1361-1368
7. Girling DJ. Hong Kong Chest Service/Tuberculosis Research Centre Madras/British Medical Research Council study of two-month and three-month regimens for smear-negative pulmonary tuberculosis: results up to two years. *Br J Dis Chest* 1979;73:413
8. Hong Kong Chest Service/Tuberculosis Research Centre Madras/British Medical Research Council. A controlled trial of 2-month, 3-month, and 12-month regimens of chemotherapy for sputum-smear-negative pulmonary tuberculosis: the results at 30 months. *Am Rev Resp Dis* 1981;124(2):138-142
9. Hong Kong Chest Service/Tuberculosis Research Centre Madras/British Medical Research Council. A controlled trial of 2-month, 3-month, and 12-month regimens of chemotherapy for sputum-smear-negative pulmonary tuberculosis. Results at 60 months. *Am Rev Resp Dis* 1984;130(1):23-28
10. Thompson NJ, International union against tuberculosis committee on prophylaxis. Efficacy of various durations of isoniazid preventive therapy for tuberculosis: five years of follow-up in the IUAT trial. *Bull WHO* 1982;60(4):555-564
11. Chan SL. Hong Kong Chest Service/Tuberculosis Research Centre Madras/British Medical Research Council studies of smear-negative pulmonary tuberculosis. *Bull Int Un Tuberc* 1985;60(3-4):106-107
12. Hong Kong Chest Service/Tuberculosis Research Centre Madras/British Medical Research Council. A controlled trial of 3-month, 4-month, and 6-month regimens of chemotherapy for sputum-smear-negative pulmonary tuberculosis. Results at five years. *Am Rev Resp Dis* 1989;139(4):871-6
13. Anastasatu C, Bercea O, Corlan E. Controlled clinical trial on smear-negative, x-ray positive new cases, with a view to establish if and how to treat them. *Bull Int Union Tuberc Lung Dis* 1985;60:108-109
14. Cowie RL, Langton ME, Escreet BC. Diagnosis of sputum smear- and sputum culture-negative pulmonary tuberculosis. *S Afr Med J* 1985;68(12):878
15. Cowie RL, Langton ME, Escreet BC. Ultrashort-course chemotherapy for culture-negative pulmonary tuberculosis – a qualified success. *S Afr Med J* 1985;68(12):879-880
16. Norregaard J, Heckscher T, Viskum K. Abacillary pulmonary tuberculosis. *Tubercle* 1990;71:35-38

17. Teo SK, Tan KK, Khoo TK. Four-month chemotherapy for the treatment of smear-negative pulmonary tuberculosis: results at 30 to 60 months. *Ann Acad Med Singap* 2002;31(2):175-81
18. Ohmori M, Wada M, Nishii K, et al. [Preventive therapy in middle-aged and elderly persons selected from the population-based screening by mass miniature radiography-methodological aspect and adverse reactions]. *Kekkaku* 2002;77(10):647-58.
19. Turkova A, Wills GH, Wobudeya E, et al. Shorter treatment for nonsevere tuberculosis in african and indian children. *N Engl J Med* 2022;386:911-922.

**Supplementary table S2: Excluded studies at full text review**

| Study title                                                                                                                                                                                                                                                                                   | Reason for exclusion          |
|-----------------------------------------------------------------------------------------------------------------------------------------------------------------------------------------------------------------------------------------------------------------------------------------------|-------------------------------|
| Grant. Observations on cases with minimal tuberculosis of doubtful activity with or without chemotherapy. <i>Zeitschrift fur tuberkulose und erkrankungen der thoraxorgane</i> 1966;125(3):198-201                                                                                            | Inappropriate study design    |
| Ade S, Harries AD, Trebucq A, et al. National profile and treatment outcomes of adult smear-negative pulmonary TB patients in Benin. <i>Trans R Soc Trop Med Hyg</i> 2013;107(12):783-8                                                                                                       | Inappropriate study design    |
| Ormerod LP, Green RM, Horsfield N. Outcome of the treatment of culture negative tuberculosis (respiratory and non-respiratory): Blackburn 1996-2000. <i>J Infect</i> 2002;45(2):88-9                                                                                                          | Inappropriate study design    |
| Ormerod LP, McCarthy OR, Rudd RM, et al. Short-course chemotherapy for tuberculosis pleural effusion and culture-negative pulmonary tuberculosis. <i>Tuber Lung Dis</i> 1995;76(1):25-7                                                                                                       | Inappropriate study design    |
| Dutt AK, Moers D, Stead WW. Smear-negative and culture-negative pulmonary tuberculosis - 4-month short-course chemotherapy. <i>Am Rev Resp Dis</i> 1989;139(4):867-870                                                                                                                        | Inappropriate study design    |
| Ferebee SH, Mount FW, Murray FJ, et al. A controlled trial of isoniazid prophylaxis in mental institutions. <i>Am Rev Respir Dis</i> 1963;88:161-75                                                                                                                                           | Inappropriate study design    |
| Krishnaswami KV. Fate of abacillary pulmonary tuberculosis cases. <i>Indian J Chest Dis Allied Sci</i> 1976;18(3):133-140                                                                                                                                                                     | Inappropriate study design    |
| Rubin EH, Cheifetz I, Katzev H, et al. Isoniazid in pulmonary tuberculosis, with special reference to x-ray findings after four and six months' treatment. <i>Med Clin North Am</i> 1953;1:885-901                                                                                            | Irrelevant patient population |
| Chan SL, Wong PC, Tam CM. 4-, 5- and 6-month regimens containing isoniazid, rifampicin, pyrazinamide and streptomycin for treatment of pulmonary tuberculosis under program conditions of Hong Kong. <i>Tubercle Lung Dis</i> 1994;75(4):245-50                                               | Irrelevant patient population |
| Zierski M, Bek E, Long MW, et al. Short-course (6 month) cooperative tuberculosis study in Poland: results 18 months after completion of treatment. <i>Am Rev Resp Dis</i> 1980;122(6):879-89                                                                                                 | Irrelevant patient population |
| Hong Kong Chest Service/Tuberculosis Research Centre Madras/British Medical Research Council. A controlled clinical comparison of 6 and 8 months of antituberculosis chemotherapy in the treatment of patients with silicotuberculosis in Hong Kong. <i>Am Rev Resp Dis</i> 1991;143(2):262-7 | Irrelevant patient population |
| Yanuar M, Nawas A, Hudoyo A, et al. Evaluation of diagnosis and treatment of pulmonary tuberculosis smear acid fast bacilli negative in jakarta respiratory centre (JRC). <i>Respirology</i> 2010;15(s2):62                                                                                   | Irrelevant patient population |

|                                                                                                                                                                                                                           |                               |
|---------------------------------------------------------------------------------------------------------------------------------------------------------------------------------------------------------------------------|-------------------------------|
| Chakraborty H. Treatment of MMR detected shadows of doubtful activity with INH alone. <i>J Ind Med Assoc.</i> 1972;58(5):162-4                                                                                            | Irrelevant patient population |
| Baba H, Shinkai A, Azuma Y. Controlled clinical trial of three 6 month regimens of chemotherapy for pulmonary tuberculosis (Report 2). Results at one year after completing chemotherapy. <i>Kekkaku</i> 1979;54(1):29-36 | Irrelevant patient population |
| Ovchinnikova IE, Starshinova AA, Dovgaliuk IF. [Optimization of chemotherapy regimens in children with primary pulmonary tuberculosis]. <i>Problemy tuberkuleza I boleznei legkikh</i> 2009;(1):36-40                     | Irrelevant patient population |
| Horwitz O, Payne PG, Wilbek E. Epidemiological basis of tuberculosis eradication. 4.The Isoniazid trial in Greenland. <i>Bull WHO</i> 1966;35(4):509-26                                                                   | Irrelevant patient population |

**Supplementary table S3: Study design and eligibility criteria**

| Study                 | Number of negative sputum cultures | Chest x-ray criteria                                                                              | Clinical criteria                 | Other criteria                 | Exclusion criteria                                                                                               |
|-----------------------|------------------------------------|---------------------------------------------------------------------------------------------------|-----------------------------------|--------------------------------|------------------------------------------------------------------------------------------------------------------|
| Clayson (1963)        | 1                                  | "Radiographic abnormality considered to be TB... ..and no cavitation"                             | Physician prepared to not treat   | Age > 15 years old<br>European | Extra-pulmonary TB<br>Pregnancy<br>Diabetes<br>Known to TB service<br>Disease obviously due to primary infection |
| Frimodt-Moller (1965) | Not reported                       | "X-ray lesions consistent with pulmonary TB... ..which are not calcified"                         | None                              | None                           | On TB treatment                                                                                                  |
| Pamra (1971)          | 2                                  | "presumably tuberculous pulmonary lesions"<br>"radiological stability over at least three months" | Asymptomatic                      | None                           | Previous TB treatment<br>Diabetes<br>Extra-pulmonary TB<br>Non-tuberculosis mycobacteria disease                 |
| Aneja (1979)          | 1                                  | "Abnormal shadow on photofluorogram"                                                              | Well enough to attend outpatients | Aged > 12 years old            | Previous treatment for TB lasting >2 weeks                                                                       |

|                   |              |                                                                                                                                                                    |                            |                                                |                                                                                         |
|-------------------|--------------|--------------------------------------------------------------------------------------------------------------------------------------------------------------------|----------------------------|------------------------------------------------|-----------------------------------------------------------------------------------------|
| Thompson (1982)   | 2            | "Fibrotic lung lesions of probable tuberculous origin, on chest x-ray stable for 12 months... .. and not limited to solitary calcifications or pleural thickening" | None                       | Tuberculin skin test positive >6mm             | Previous TB treatment                                                                   |
| Anon (1984)       | 5            | "Radiographically active pulmonary TB"                                                                                                                             | None                       | Aged 15-75 years old                           | Previous TB treatment                                                                   |
| Anastasatu (1985) | Not reported | "Pulmonary lesions suggestive of TB"                                                                                                                               | None                       | None                                           | None                                                                                    |
| Cowie (1985)      | 2            | "New or enlarging apical lung lesions, persistent over two months"                                                                                                 | None                       | Tuberculin skin test (5TU) >9mm after 72 hours | None                                                                                    |
| Anon (1989)       | 4            | "Radiologically active TB"                                                                                                                                         | None                       | Aged 15-75 years old                           | Previous TB treatment                                                                   |
| Norregaard (1990) | 6            | "x-ray shadows consistent with active TB"                                                                                                                          | None                       | None                                           | None                                                                                    |
| Teo (2002)        | 4            | "Abnormal chest x-ray compatible with a diagnosis of pulmonary TB"                                                                                                 | Respiratory symptoms       | None                                           | Previous TB<br>Mental health disorder<br>Alcohol or substance use disorder<br>Pregnancy |
| Ohmori (2002)     | 3            | "fibrous lesion compatible with healed TB stable for 1 years"                                                                                                      | None                       | None                                           | Severe "disease"<br>Severe liver dysfunction<br>Previous TB                             |
| Turkova (2022)    | 2            | "confined to one lobe with no cavities, no signs of military TB, no complex pleural effusion..."                                                                   | Symptomatic, non-severe TB | Aged <16 years old                             | Suspected DR-TB<br>Pregnancy                                                            |

**Supplementary table S4: Outcome assessments**

| Study | Microbiological assessment |           | Radiographic assessment |           |
|-------|----------------------------|-----------|-------------------------|-----------|
|       | Method                     | Frequency | Method                  | Frequency |
|       |                            |           |                         |           |

|                       |                                                                    |                                                                                                                                  |                                                                                                          |                                                                                                                  |
|-----------------------|--------------------------------------------------------------------|----------------------------------------------------------------------------------------------------------------------------------|----------------------------------------------------------------------------------------------------------|------------------------------------------------------------------------------------------------------------------|
| Clayson (1963)        | Sputum or gastric lavage or laryngeal swab smear and culture       | Every 3 months for two years, then every 12 months for three years. Additional testing if clinical or radiographic deterioration | Miniature film reported by a central blinded panel on two separate occasions                             | Every 3 months for two years, then every 12 months for three years. Additional testing if clinical deterioration |
| Frimodt-Moller (1965) | Sputum and laryngeal swab smear and culture                        | Every 3 months for four years                                                                                                    | Chest x-ray reported by two independent readers and re-examined by a blinded reader                      | Every 3 months for four years                                                                                    |
| Pamra (1971)          | Sputum and laryngeal swab culture                                  | Every 3 months for one year, then every 6 months for five years                                                                  | Miniature film reported by two experienced readers with a third reader if disagreement                   | Every 3 months for one year, then every 6 months for five years                                                  |
| Aneja (1979)          | Sputum smear and culture                                           | Every 2 months for six months, then every 3 months for six months                                                                | Photofluorogram reported by a medical officer and study readers, with disagreement resolved by an umpire | Every 2 months for six months, then every 3 months for six months.                                               |
| Thompson (1982)       | Sputum culture                                                     | Every 12 months for five years                                                                                                   | Chest x-ray reported by a single reader                                                                  | Every 12 months for five years                                                                                   |
| Anon (1984)           | Sputum smear and culture                                           | Every 1 month for one year, then every 3 months for four years                                                                   | Chest x-ray reported at "physician meetings"                                                             | Every 1 month for three months, then every 2 months for nine months, then every 12 months for four years         |
| Anastasatu (1985)     | Sputum smear and culture                                           | Frequency not reported                                                                                                           | Chest x-ray. Procedure for description not reported                                                      | Frequency not reported                                                                                           |
| Cowie (1985)          | Sputum smear and culture                                           | If clinical or radiographic progression                                                                                          | Chest x-ray. Procedure for description not reported                                                      | Every 3 months for three years, then every 6 months for two years                                                |
| Anon (1989)           | Sputum smear and culture                                           | Every 1 month for five years                                                                                                     | PA chest x-ray reported at "physician meetings" with an independent blinded assessment                   | Every 6 months for one year, then every 12 months for four years                                                 |
| Norregaard (1990)     | Sputum smear and culture (gastric lavage if unable to expectorate) | Every 1 month for three months, then every 2 months for six months, then every 12 months for two years                           | Chest x-ray reported by a "conference of consultants"                                                    | Every 1 month for three months, then every 2 months for six months, then every 12 months for two years.          |
| Teo (2002)            | Sputum smear and culture                                           | Every 1 month for one year, then every 3 months for one year, then every 6 months for three years                                | Chest x-ray reported by a blinded radiologist                                                            | Every 4-6 months for one year, then every 12 months for four years                                               |
| Ohmori (2002)         | Not reported                                                       | n/a                                                                                                                              | Chest x-ray. Procedure for description not reported                                                      | Every 6 months for five years                                                                                    |

|                |                                                |                                                                                                  |                                                                                                  |                        |
|----------------|------------------------------------------------|--------------------------------------------------------------------------------------------------|--------------------------------------------------------------------------------------------------|------------------------|
| Turkova (2022) | Sputum smear, Xpert MTB/RIF assay, and culture | If previous samples positive, clinical suspicion of treatment failure, or new contact with DR-TB | Chest x-ray reported by two, independent, blinded experts. Procedure described in study protocol | Frequency not reported |
|----------------|------------------------------------------------|--------------------------------------------------------------------------------------------------|--------------------------------------------------------------------------------------------------|------------------------|

\* 70 participants did not get a baseline large film (which was used to estimate size of lesion), therefore relied on result from miniature film.

### Supplementary table S5: Participant characteristics

| Study                 | Age (years old)                                                    | Gender                         | Symptoms at baseline         | Cavitary lung disease at baseline | Bilateral changes at baseline |
|-----------------------|--------------------------------------------------------------------|--------------------------------|------------------------------|-----------------------------------|-------------------------------|
| Clayson (1963)        | 15-20 (21)<br>21-30 (47)<br>31-40 (44)<br>40+ (77)                 | Male (110)<br>Female (79)      | Not reported                 | n/a (excluded)                    | 49/189 (26%)                  |
| Frimodt-Moller (1965) | 15-34 (104)<br>35-44 (76)<br>45+ (169)                             | Male (248)<br>Female (101)     | Not reported                 | 84/349 (24%)                      | 28/349 (8%)                   |
| Pamra (1971)          | 15-24 (39)<br>25-34 (122)<br>25-44 (103)<br>45+ (53)               | Male (277)<br>Female (40)      | 0/317 (0%) had symptoms      | Not reported                      | 20/317 (6%)                   |
| Aneja (1979)          | 12-24 (37)<br>25-44 (104)<br>45+ (72)                              | Male (131)<br>Female (82)      | 205/213 (96%) cough >2 weeks | 38/213 (18%)                      | Not reported                  |
| IUAT (1982)           | Not reported                                                       | Male (14750)<br>Female (13080) | Not reported                 | Not reported                      | Not reported                  |
| Anon (1984)           | 15-24 (300)<br>25-34 (168)<br>34-44 (88)<br>45-54 (86)<br>55+ (49) | Male (509)<br>Female (182)     | "Majority with symptoms"     | 7/691 (1%)                        | Not reported                  |
| Anastasatu (1985)     | Not reported                                                       | Not reported                   | Not reported                 | Not reported                      | Not reported                  |



|                   |                                                                     |                            |                               |                |                |
|-------------------|---------------------------------------------------------------------|----------------------------|-------------------------------|----------------|----------------|
| Cowie (1985)      | Not reported                                                        | Male (402)<br>Female (0)   | Not reported                  | Not reported   | Not reported   |
| Anon (1989)       | 15-24 (565)<br>25-34 (302)<br>35-44 (108)<br>45-54 (81)<br>55+ (62) | Male (724)<br>Female (394) | 1118/1118 (100%) had symptoms | 12/1118 (1%)   | Not reported   |
| Norregaard (1990) | 20-39 (10)<br>40-59 (17)<br>60-69 (13)<br>70+ (10)                  | Male (44)<br>Female (6)    | 33/50 (66%) had cough         | 3/50 (6%)      | 6/50 (12%)     |
| Teo (2002)        | 15-34 (193)<br>35-54 (93)<br>55+ (28)*                              | Male (235)<br>Female (79)  | 0/314 (0%) had symptoms       | Not reported   | Not reported   |
| Ohmori (2002)     | Not reported<br>Median: 66                                          | Male (15)<br>Female (14)   | 0/29 (0%) had symptoms        | Not reported   | Not reported   |
| Turkova (2022)    | Not reported<br>Median: 3.5                                         | Male (621)<br>Female (583) | 1204/1204 (100%) had symptoms | n/a (excluded) | n/a (excluded) |

\*Age details for Teo (2002) include patients excluded as culture positive

**Supplementary figure S6: Funnel plot for assessment of publication bias**

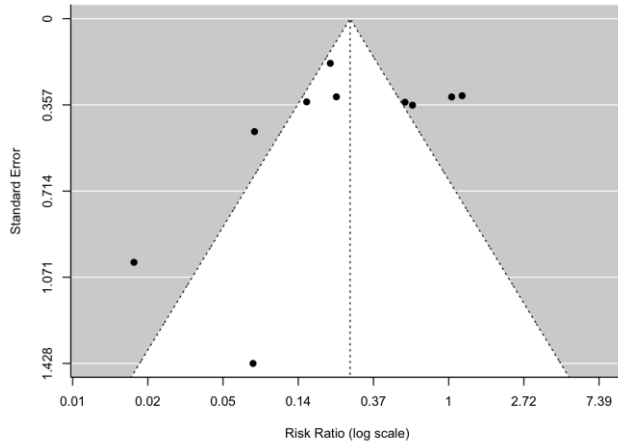

**Supplementary table S7: Forest plot of primary outcome stratified by case-finding strategy**

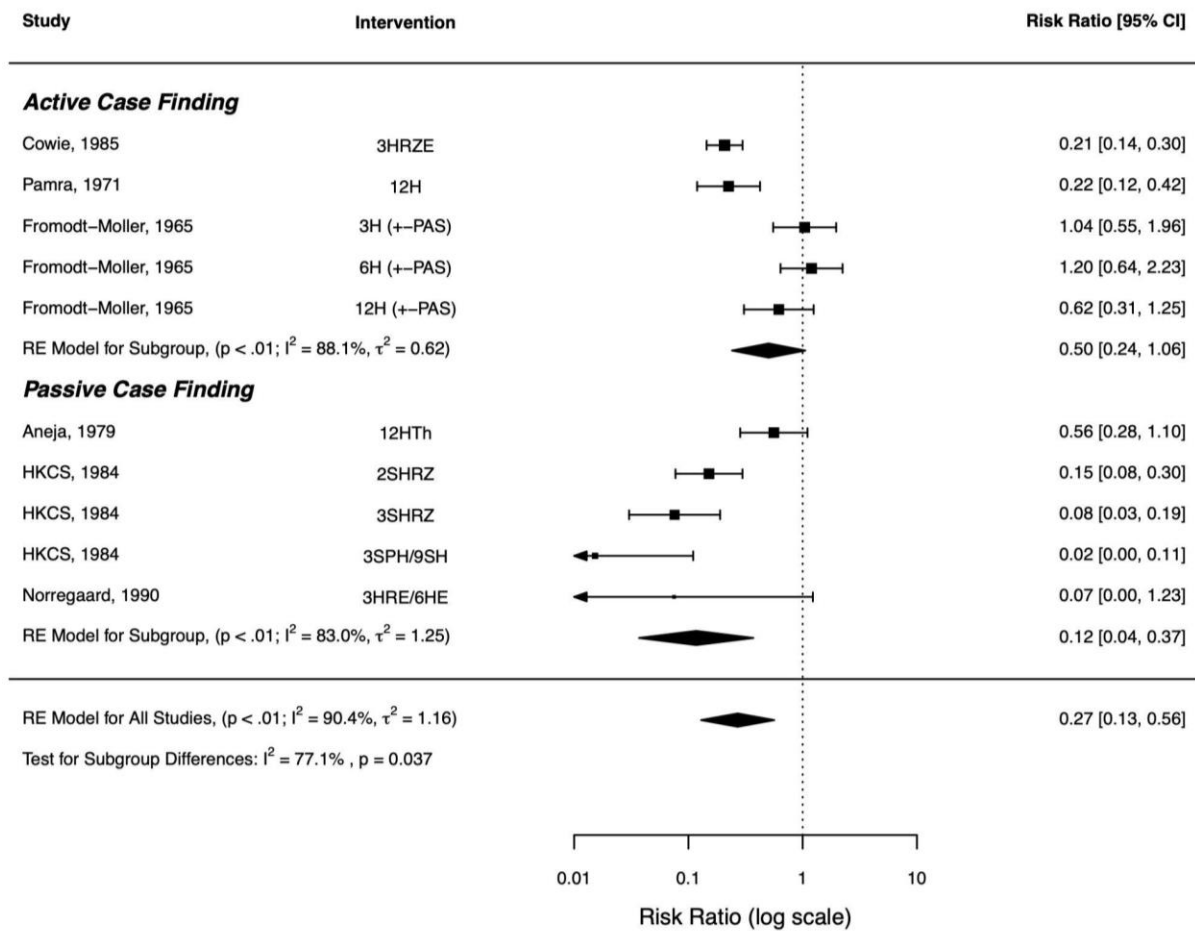

**Supplementary table S8: Forest plot of primary outcome stratified by number of baseline sputa**

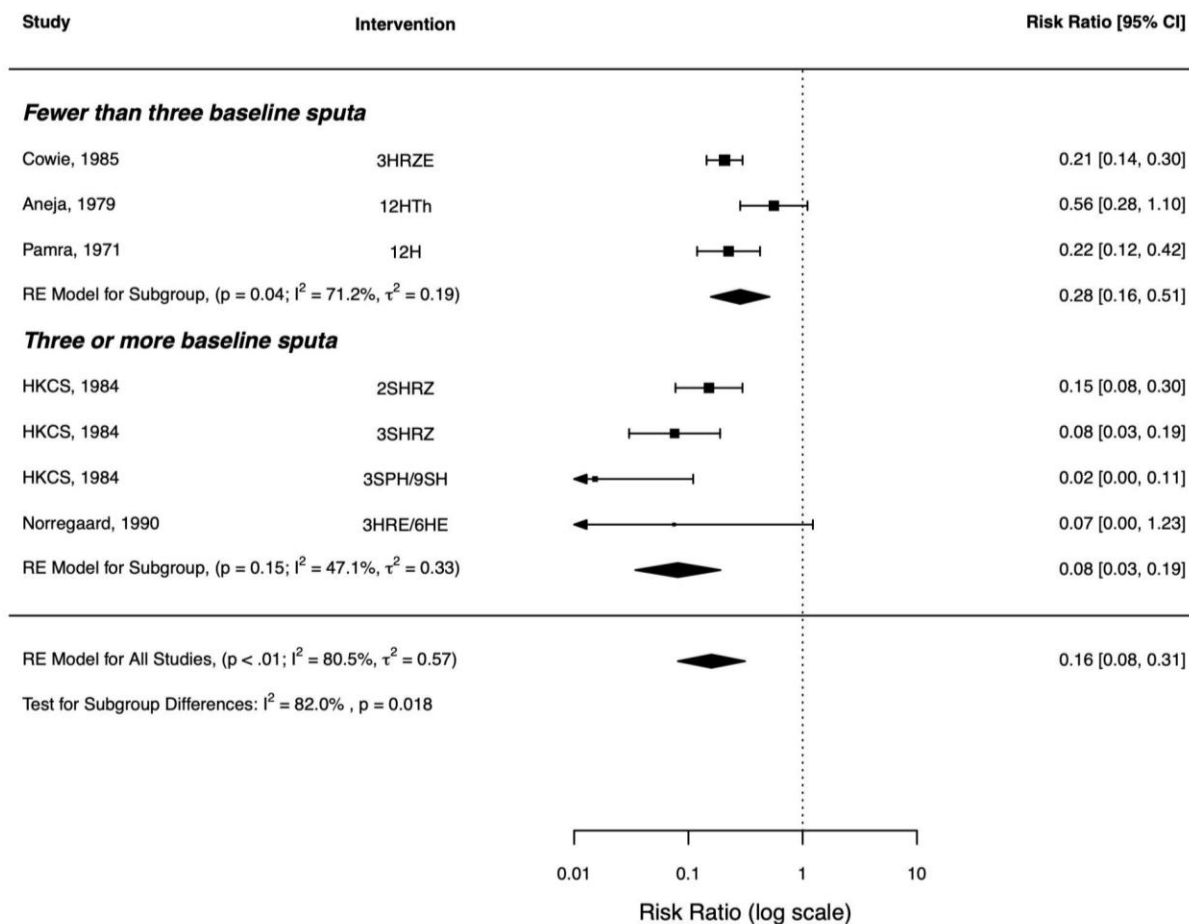

**Supplementary table S9: Sensitivity analyses**

| Analysis criteria                                                                                                           | Number of studies | RR (95% CI)        |
|-----------------------------------------------------------------------------------------------------------------------------|-------------------|--------------------|
| Only studies with low or some risk of bias                                                                                  | 3                 | 0.12 (0.04 - 0.37) |
| All TB diagnoses (e.g., clinical or radiographic) as the primary end-point (as opposed to only bacteriologically confirmed) | 7                 | 0.32 (0.18 - 0.58) |
| Using per-protocol results                                                                                                  | 3                 | 0.14 (0.05 - 0.39) |
| Only rifampicin containing regimens                                                                                         | 3                 | 0.15 (0.09 - 0.25) |

**Supplementary table S10: Network meta-analysis**

| Study       | Intervention | Events | Group Size | Group    |
|-------------|--------------|--------|------------|----------|
| Anon (1984) | No treatment | 71     | 173        | No_trt   |
| Anon (1984) | 2SHRZ        | 10     | 161        | 2mth_trt |
| Anon (1984) | 3SHRZ        | 5      | 161        | 3mth_trt |

|             |                                                              |    |     |           |
|-------------|--------------------------------------------------------------|----|-----|-----------|
| Anon (1984) | 3SPH/9S <sub>2</sub> H <sub>2</sub>                          | 1  | 160 | 12mth_trt |
| Anon (1989) | 3SHRZ                                                        | 10 | 389 | 3mth_trt  |
| Anon (1989) | 4S <sub>3</sub> H <sub>3</sub> R <sub>3</sub> Z <sub>3</sub> | 4  | 359 | 4mth_trt  |

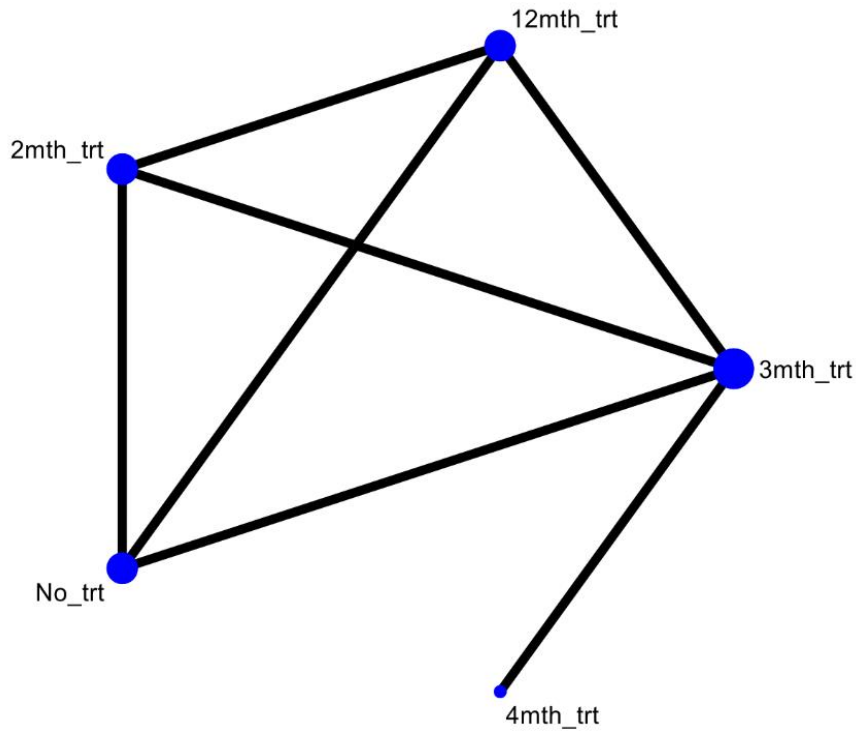

| Rank             | 12mth_trt  | 2mth_trt   | 3mth_trt   | 4mth_trt   | No_trt     |
|------------------|------------|------------|------------|------------|------------|
| Best             | 73.5       | 0.1        | 0.5        | 26.0       | 0.0        |
| 2nd              | 19.9       | 1.8        | 13.1       | 65.1       | 0.0        |
| 3rd              | 5.7        | 9.5        | 77.4       | 7.3        | 0.0        |
| 4th              | 0.8        | 88.6       | 8.9        | 1.6        | 0.0        |
| Worst            | 0.0        | 0.0        | 0.0        | 0.0        | 100.0      |
| <b>Mean Rank</b> | <b>1.3</b> | <b>3.9</b> | <b>2.9</b> | <b>1.8</b> | <b>5.0</b> |
| <b>SUCRA</b>     | <b>0.9</b> | <b>0.3</b> | <b>0.5</b> | <b>0.8</b> | <b>0.0</b> |
